# Supplementary material for: Senataxin and RNase H2 act redundantly to suppress genome instability during class switch recombination
Source: eLife. 2022 Dec 21;11:e78917. doi: 10.7554/eLife.78917 (PMC9771370; doi:10.7554/eLife.78917)
Supplement: Figure 1—source data 2. [file elife-78917-fig1-data2.xlsx]

## Sheet: Sheet1
Figure 1C dot blot		0.5ug			0.25ug			0.125ug
	Wild type	1	1	1	1	1	1	1	1	1
	setx-/-	1.09979	1.70253	1.80887	1.82298	1.46981	1.47487	2.3523	1.7498	4.00559
	Rnaseh2bf/f	1.63294	1.18063	1.20601	3.81734	1.50386	1.17076	2.5879	2.76331	2.08077
	setx-/-Rnaseh2bf/f	1.58199	2.41221	1.85133	4.49881	4.93517	1.52607	4.3281	4.45213	4.32968
	Rnase H	0.1	0.1	0.1	0.1	0.1	0.1	0.1	0.1	0.1
Figure 1D DRIP
		WT			setx-/-			Rnaseh2bf/f			setx-/-Rnaseh2bf/f			RNaseH treatment
	Eμ	0.792928	0.172775	0.57833	1.35528	0.176405	1.17281	1.15023	0.26738	0.797358	0.951711	0.350374	0.979397	0.169802	0.11242	0.143779
	Sμ	7.06145	8.49707	10.1258	7.06145	7.0958	9.96336	11.1577	8.20763	18.2097	16.223	14.4898	22.6792	3.49492	3.93664	5.52227
	Sγ1	8.33161	9.96566	13.4851	9.35191	6.52947	10.1962	8.80666	7.92805	10.7279	8.2932	8.15094	9.64623	2.43726	0.413789	1.92109
	Sγ3	0.423363	0.261878	0.377173	0.356004	0.478624	0.477409	0.432258	0.202636	0.814112	0.721947	0.549795	0.643182	0.017603	0.365252	0.228452
Figure 1E Germline RNA
		WT				setx-/-				Rnaseh2bf/f				setx-/-Rnaseh2bf/f
	Iμ-Cμ spliced	1	1	1	1	0.772889	0.925518	0.632148	1.02574	0.522439	0.720298	0.836053	0.874583	0.457973	0.66281	0.647671	0.66281
	Iμ-Cμ unspliced	1	1	1	1	0.764012	0.498846	1.26868	1.0656	1.05946	0.481854	0.946058	0.509328	0.725309	0.459032	0.742262	0.365177
	Iγ1-C1γ spliced	1	1	1	1	0.863539	0.773782	0.761368	1.06191	0.679871	0.593231	0.668964	0.652176	0.587774	0.590496	0.52003	0.491978
	Iγ1-Cγ1 unspliced	1	1	1	1	0.839926	0.80478	1.23685	0.82932	1.51572	0.578344	1.09936	0.484085	0.779165	0.647671	0.575678	0.399611
