# Supplementary material for: Senataxin and RNase H2 act redundantly to suppress genome instability during class switch recombination
Source: eLife. 2022 Dec 21;11:e78917. doi: 10.7554/eLife.78917 (PMC9771370; doi:10.7554/eLife.78917)
Supplement: Figure 2—source data 1. [file elife-78917-fig2-data1.xlsx]

## Sheet: Sheet1
Figure 2A IgG1 CSR day3		WT	setx-/-	Rnaseh2bf/f	setx-/-Rnaseh2bf/f
	1	35.6	39.2	31.5	30.9
	2	21.9	26.8	23.1	25.4
	3	25.6	25.7	26.5	23.6
	4	30.3	34.1	31.9	33.9
	5	21.1	21.4	18.9	27
	6	26.4	29.1	31.4	29.3
	7	15.7	11.8	16.1	16.5
	8	18.1	25.4	19.1	20.1
	9	16.9	13.9	13.7	17.6
Figure 2B IgG1 CSR day4		WT	setx-/-	Rnaseh2bf/f	setx-/-Rnaseh2bf/f
	1	49.2	57.5	46.9	42.7
	2	42.2	45.1	38.2	44.1
	3	40.6	30.6	39	39.1
	4	50.3	44.1	42.2	48.9
	5	55.7	66.7	59.4	51.9
	6	21.4	41	35.5	24.6
	7	17.7	23.7	18.6	18.9
	8	33.8	37.5	37.3	36.2
Figure 2D IgA CSR	WT					setx-/-					Rnaseh2bf/f					setx-/- Rnaseh2bf/f
	11.5	8	8.26	7.33	6.63	16.6	7.56	10.3	7.89	7.74	11.8	7.2	8.33	7.78	5.24	10.6	10.01	4.76	4.53
Figure 2E IgG2B CSR	WT					setx-/-					Rnaseh2bf/f					setx-/- Rnaseh2bf/f
	8	6.01	2.07	3.94	4.45	4.13	5.36	6.16	5.52	4.08	6.37	5.89	3.04	4.65	4.63	6.4	10.3	5.63	4.99
