# Supplementary material for: Senataxin and RNase H2 act redundantly to suppress genome instability during class switch recombination
Source: eLife. 2022 Dec 21;11:e78917. doi: 10.7554/eLife.78917 (PMC9771370; doi:10.7554/eLife.78917)
Supplement: Figure 3—figure supplement 2—source data 3. [file elife-78917-fig3-figsupp2-data3.xlsx]

## Sheet: Sheet1
Figure 3-figure supplement 2E	WT	setx-/-	Rnaseh2bf/f	setx-/-Rnaseh2bf/f
	0.19697	0.333333	0.622951	0.578947
	0.166667	0.076923	0.52381	0.486486
	0.196078	0.1	0.397059	0.44
Figure 3-figure supplement 2F	WT	setx-/-	Rnaseh2bf/f	setx-/-Rnaseh2bf/f
	0	0.039216	0	0.070175
	0	0	0.015873	0.054054
	0.019608	0.02	0.029412	0.04
