# Supplementary material for: Senataxin and RNase H2 act redundantly to suppress genome instability during class switch recombination
Source: eLife. 2022 Dec 21;11:e78917. doi: 10.7554/eLife.78917 (PMC9771370; doi:10.7554/eLife.78917)
Supplement: Figure 3—figure supplement 3—source data 1. [file elife-78917-fig3-figsupp3-data1.xlsx]

## Sheet: Sheet1
Figure 3-figure supplement 3C		WT			setx-/-			Rnaseh2bf/f			setx-/- Rnaseh2bf/f
	G1	60.8	65.5	57.8	61.6	64.3	60.1	62.3	60.9	55	61	68.7	62.3
	S	24.6	19.6	31.3	24.6	21.3	27	22.6	21.6	23.8	22.6	14.3	20.2
	G2/M	15.1	14.9	11.3	13.9	15.5	13.2	18.1	19.3	21.4	20.7	18.9	17.6
