# Supplementary material for: Senataxin and RNase H2 act redundantly to suppress genome instability during class switch recombination
Source: eLife. 2022 Dec 21;11:e78917. doi: 10.7554/eLife.78917 (PMC9771370; doi:10.7554/eLife.78917)
Supplement: Figure 3—source data 1. [file elife-78917-fig3-data1.xlsx]

## Sheet: Sheet1
Figure 3A	WT	setx-/-	Rnaseh2bf/f	setx-/-Rnaseh2bf/f
	0.086207	0.206897	0.0625	0.326923
	0.087719	0.0754717	0.134615	0.327273
	0.038462	0.0816327	0.16129	0.277778
	0.036364	0.105263	0.333333	0.236842
Figure 3B	WT	setx-/-	Rnaseh2bf/f	setx-/-Rnaseh2bf/f
	0	0.017241	0.020833	0.096154
	0	0	0.019231	0.072727
	0	0.040816	0.016129	0.092593
	0	0.021053	0.037037	0.052632
