# Supplementary material for: Senataxin and RNase H2 act redundantly to suppress genome instability during class switch recombination
Source: eLife. 2022 Dec 21;11:e78917. doi: 10.7554/eLife.78917 (PMC9771370; doi:10.7554/eLife.78917)
Supplement: Figure 4—source data 3. [file elife-78917-fig4-data3.xlsx]

## Sheet: Sheet1
Figure 4D		Eμ			Sμ			Sγ1
	setx-/-	1.05721	0.791098	1.87471	17.4916	20.5148	12.966	20.5623	19.6791	9.83957
	setx-/- RNaseh2Bf/f	2.65478	1.23422	4.23873	24.9666	26.8825	22.1663	21.3366	26.9447	13.4723
	setx-/- RNaseh2Bf/f +H2B-FLAG	1.08819	1.26452	1.07945	20.2792	22.6054	18.0047	19.9078	13.7554	13.7554
	RNaseH	0.577781	0.107216	0.375443	2.85191	2.14641	1.79834	2.69807	0.877778	0.877778
Figure 4E		Eμ				Sμ				Sγ1
	IgG	0.001314	0.001314	0.005512	0.009663	0.033771	0.037212	0.114229	0.131063	0.006252	0.005622	0.00118	0.003051
	H2B-FLAG	0.005861	0.011296	0.00822	0.015303	0.089535	0.08412	0.1509	0.29937	0.035287	0.028007	0.015128	0.025033
