# Supplementary material for: Senataxin and RNase H2 act redundantly to suppress genome instability during class switch recombination
Source: eLife. 2022 Dec 21;11:e78917. doi: 10.7554/eLife.78917 (PMC9771370; doi:10.7554/eLife.78917)
Supplement: Figure 5—source data 2. [file elife-78917-fig5-data2.xlsx]

## Sheet: Sheet1
Figure 5B	resting	IL4/LPS/a-RP105	LPS/a-RP105	a-RP105
	1	12.4379	9.53566	3.78423
	1	11.2816	7.62589	2.74951
	1	14.9285	12.295	2.46229
Figure 5C	WT	setx-/-	Rnaseh2bf/f	setx-/-Rnaseh2bf/f
	0.56	0.18	0.64	0.57
	0.37	0.72	0.54	0.68
	0.3	0.39	0.8	0.4
	0.72	0.24	0.49	0.52
Figure 5D	WT	setx-/-	Rnaseh2bf/f	setx-/-Rnaseh2bf/f
	0.020408	0.096154	0.022727	0.333333
	0.034483	0.072464	0.25	0.246753
	0.017857	0.033333	0.09434	0.196078
Figure 5E		Aicda-/-		setx-/- Aicda-/-		RNaseH2Bf/f Aicda-/-		setx-/- RnaseH2Bf/f Aicda-/-		setx-/-Rnaseh2bf/f
	total aberrations/cell	0.0517	0.02	0.13	0.07	0.1578	0.15	0.2727	0.21	0.2363	0.24
Figure 5F		Aicda-/-		setx-/- Aicda-/-		RNaseH2Bf/f Aicda-/-		setx-/- RnaseH2Bf/f Aicda-/-		setx-/- RNaseH2bf/f
	IgH aberrations/cell	0	0	0	0	0	0	0	0	0.072727	0.07
