# Supplementary material for: Senataxin and RNase H2 act redundantly to suppress genome instability during class switch recombination
Source: eLife. 2022 Dec 21;11:e78917. doi: 10.7554/eLife.78917 (PMC9771370; doi:10.7554/eLife.78917)
Supplement: Figure 6—source data 1. [file elife-78917-fig6-data1.xlsx]

## Sheet: Sheet1
Figure 6 D		Sμ			Sγ1
	WT	1	1	1	1	1	1
	setx-/-	0.702222	0.510506	0.90125	0.653685	1.38831	0.757858
	Rnaseh2bf/f	0.786399	0.479632	0.771997	0.659754	0.68302	0.702222
	setx-/- RNaseh2Bf/f	0.501157	0.595979	0.622725	0.768438	1.09682	0.41658
	Aicda-/-	0.537126	0.409897	0.315709	0.539614	0.642455	0.263036
Figure 6 E		Sμ			Sγ1
	WT	1	1	1	1	1	1
	setx-/-	1.72907	1.38191	1.31343	1.65481	2.41719	1.8025
	Rnaseh2bf/f	1.41749	1.39313	1.25992	1.16205	1.51572	1.56555
	setx-/- RNaseh2Bf/f	1.88775	1.13813	1.90968	1.8025	0.860551	3.08086
	Aicda-/-	0.650671	0.13742	0.702222	0.725309	0.188591	1.11729
